# Supplementary material for: Near-Infrared Laser-Based Spatially Targeted Nano-enhanced Optical Delivery of Therapeutic Genes to Degenerated Retina
Source: PubMed Central journal article supplement — Mol Ther Methods Clin Dev. 2020 Apr 7;17:758–70. doi: 10.1016/j.omtm.2020.03.030 (PMC7184107; doi:10.1016/j.omtm.2020.03.030), 2020-04-07
Supplement: mmc1.pdf [file mmc1.pdf]

**OMTM, Volume 17**

**Supplemental Information**

**Near-Infrared Laser-Based Spatially  
Targeted Nano-enhanced Optical Delivery  
of Therapeutic Genes to Degenerated Retina**

**Subrata Batabyal, Sivakumar Gajjerman, Kissaou Tchedre, Adnan Dibas, Weldon Wright, and Samarendra Mohanty**

**A**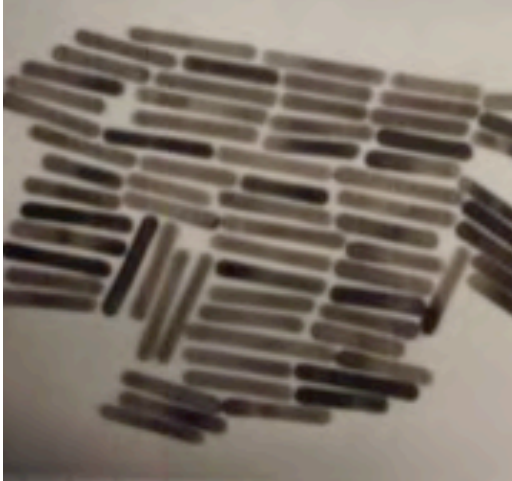**B**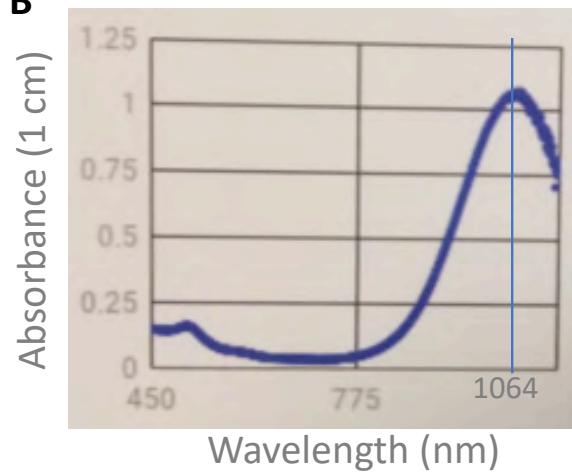

**Suppl. Fig. 1. Structural and spectroscopic properties of gold nanorods.** (A) Transmission electron microscopic image of gold nanorods used for nano enhanced optical delivery of CAG-MCO-II-mCherry into cells. These nanorods are functionalized with Concavalin A for binding of membrane of the cells. (B) Optical density of the gold nanorods, showing a peak at 1064 nm.

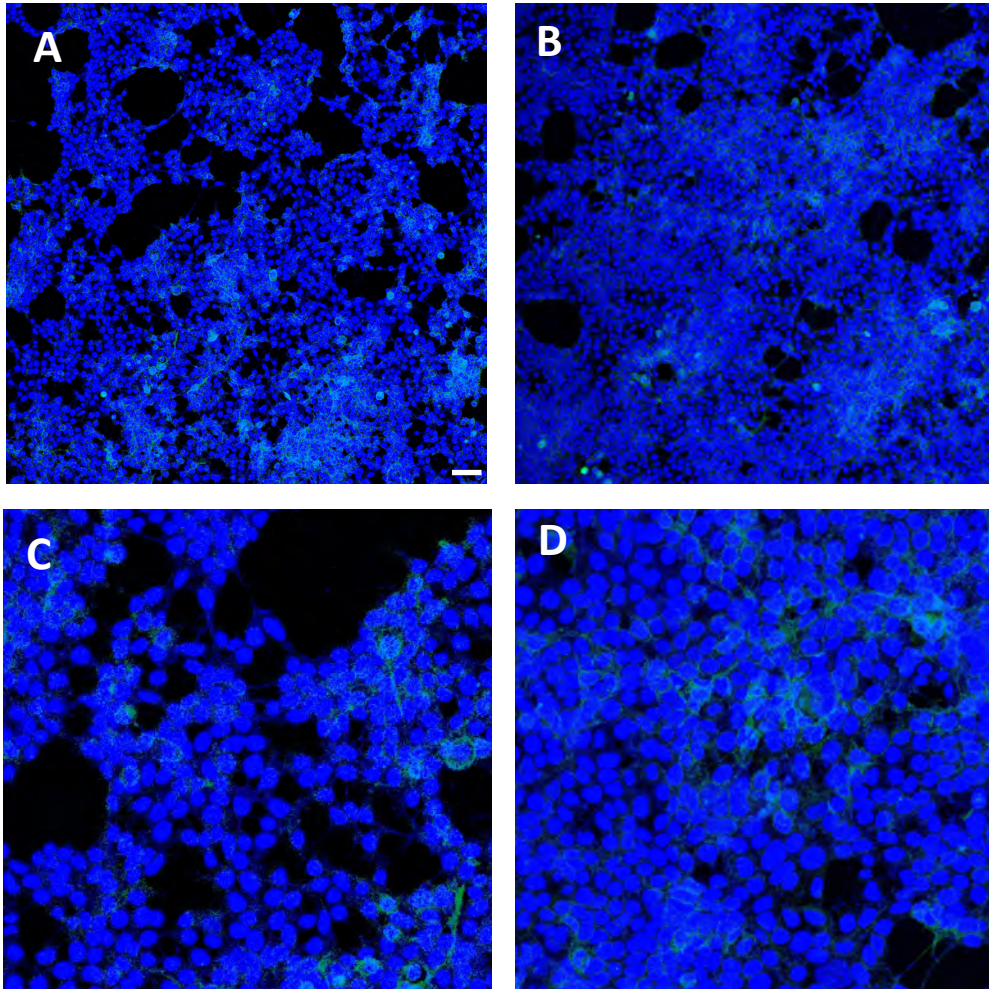

**Suppl. Fig. 2. Confocal imaging of immunostained HEK cells for various experimental controls.** (A) -Plasmid, - fGNR, - Laser; (B) + plasmids, + fGNRs - Laser. (C, D) 3x zoomed image of panels A and B, respectively. Primary antibody: Anti-mCherry, Secondary: Alexa 488. Nuclear stain: DAPI (blue). Scale bar = 50  $\mu\text{m}$ .

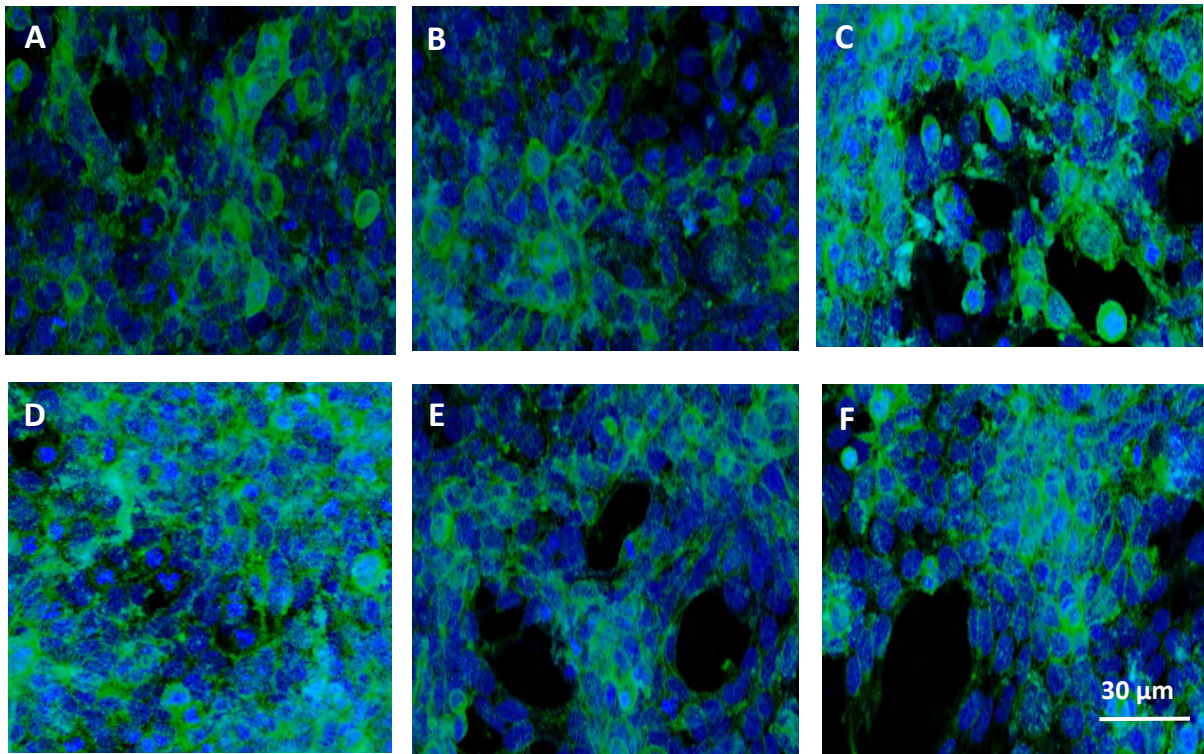

**Suppl. Fig. 3. NOD treated HEK cells using 1064 nm Nanosecond laser beam with different pulse energy and exposure. (A) 2.5 mJ/mm<sup>2</sup> (10 mJ/pulse, 10 Hz, 5 s); (B) 5 mJ/mm<sup>2</sup> (20 mJ/pulse, 10 Hz, 5 s); (C) 7.5 mJ/mm<sup>2</sup> (30 mJ/pulse, 10 Hz, 5 s); (D) 5 mJ/mm<sup>2</sup> (10 mJ/pulse, 10 Hz, 10 s); (E) 10 mJ/mm<sup>2</sup> (20 mJ/pulse, 10 Hz, 10 s); and (F) 15 mJ/mm<sup>2</sup> (30 mJ/pulse, 10 Hz, 10 s). Energy density calculated using laser exposure area of 200 mm<sup>2</sup>.**

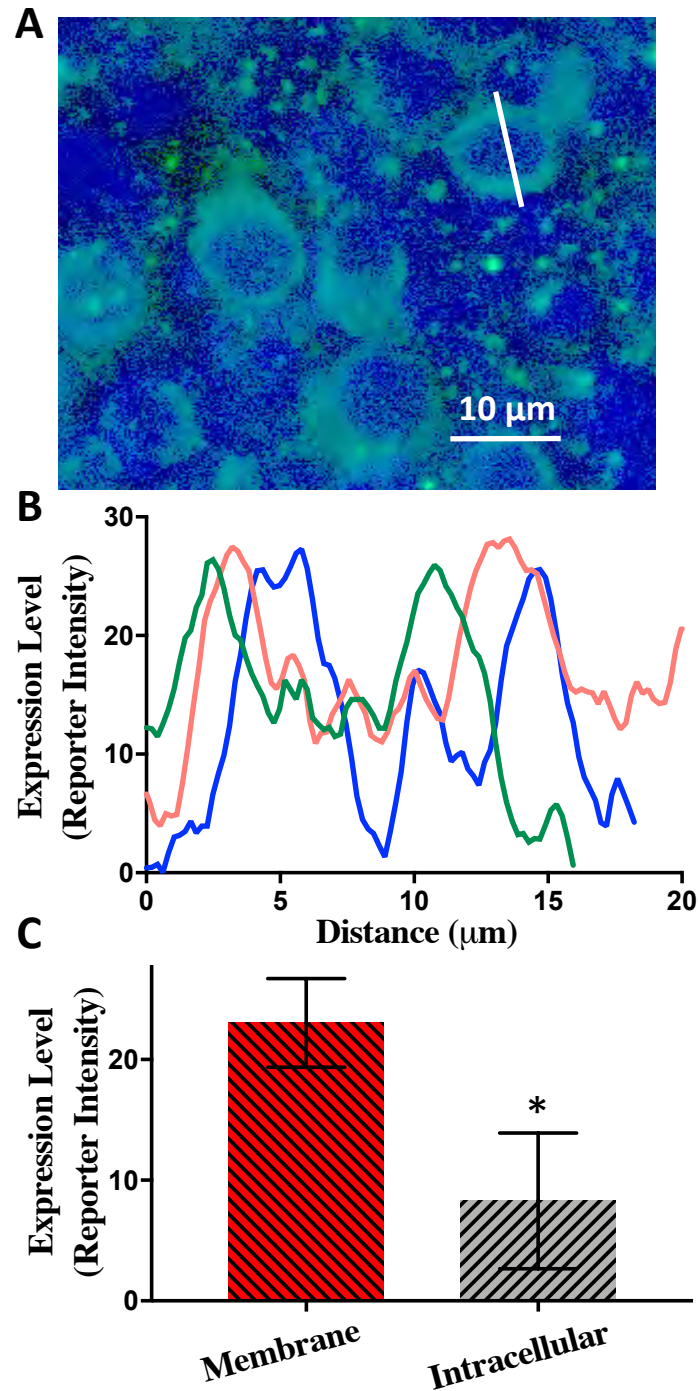

**Suppl. Fig. 4. Cell specific expression in retina explant after nanosecond pulsed laser beam based NOD.** (A) Retinal cells showing the expression of MCO-II-mCherry (Immunostained) after spatially targeted NOD (laser dose: 5 mJ/mm<sup>2</sup>). Primary antibody: Anti-mCherry, Secondary: Alexa 488. Nuclear stain: DAPI (blue). (B) Reporter fluorescence intensity along lines drawn across the transfected cells. (C) Quantitative comparison of mCherry expression in membrane and cytoplasm. Mean ± S. D. \*p<0.05.

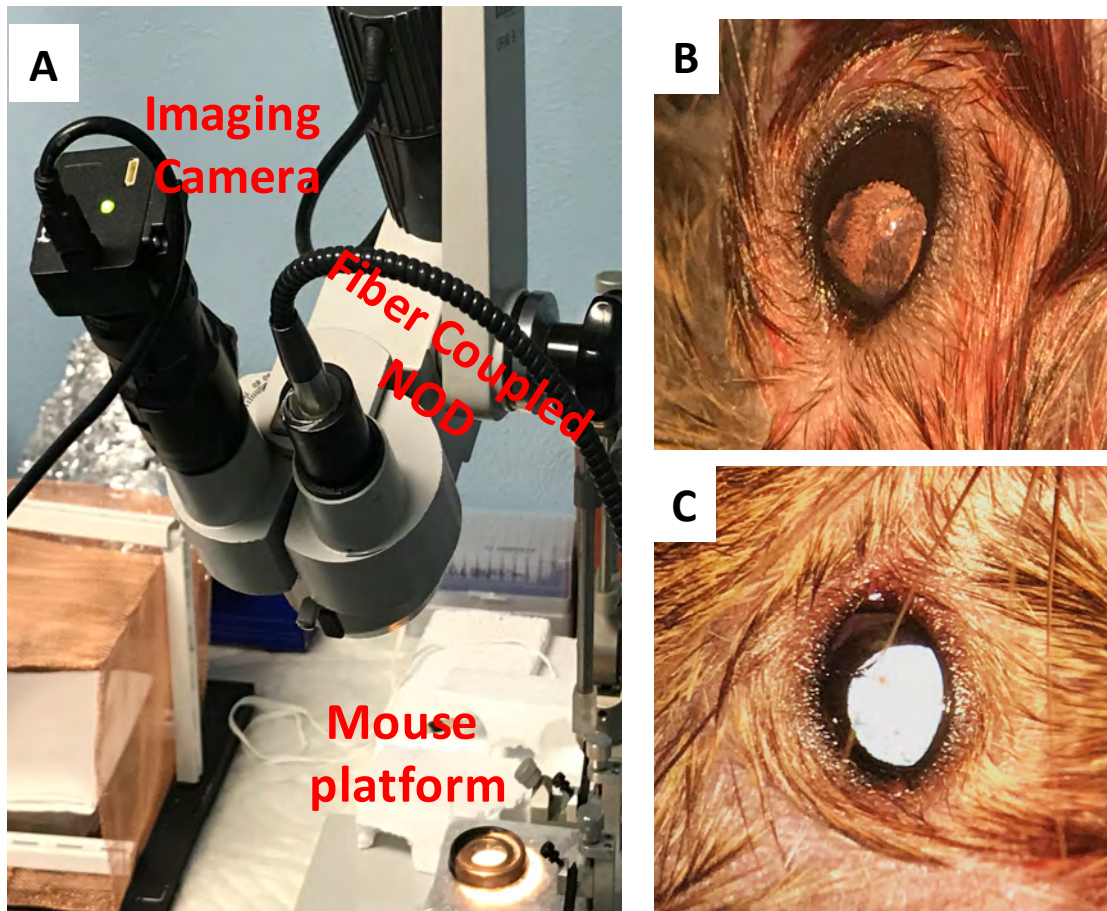

**Suppl. Fig. 5. Set up for *in-vivo* NOD using 1064 nm continuous wave laser beam. (A)** Picture of the set up, showing fiber-coupled laser beam and imaging camera integrated with a surgical microscope. (B) Image of mouse eye dilated with Tropicamide to allow NOD laser beam irradiation of retina. (C) Image of mouse retina being irradiated by the near-infrared NOD laser beam.

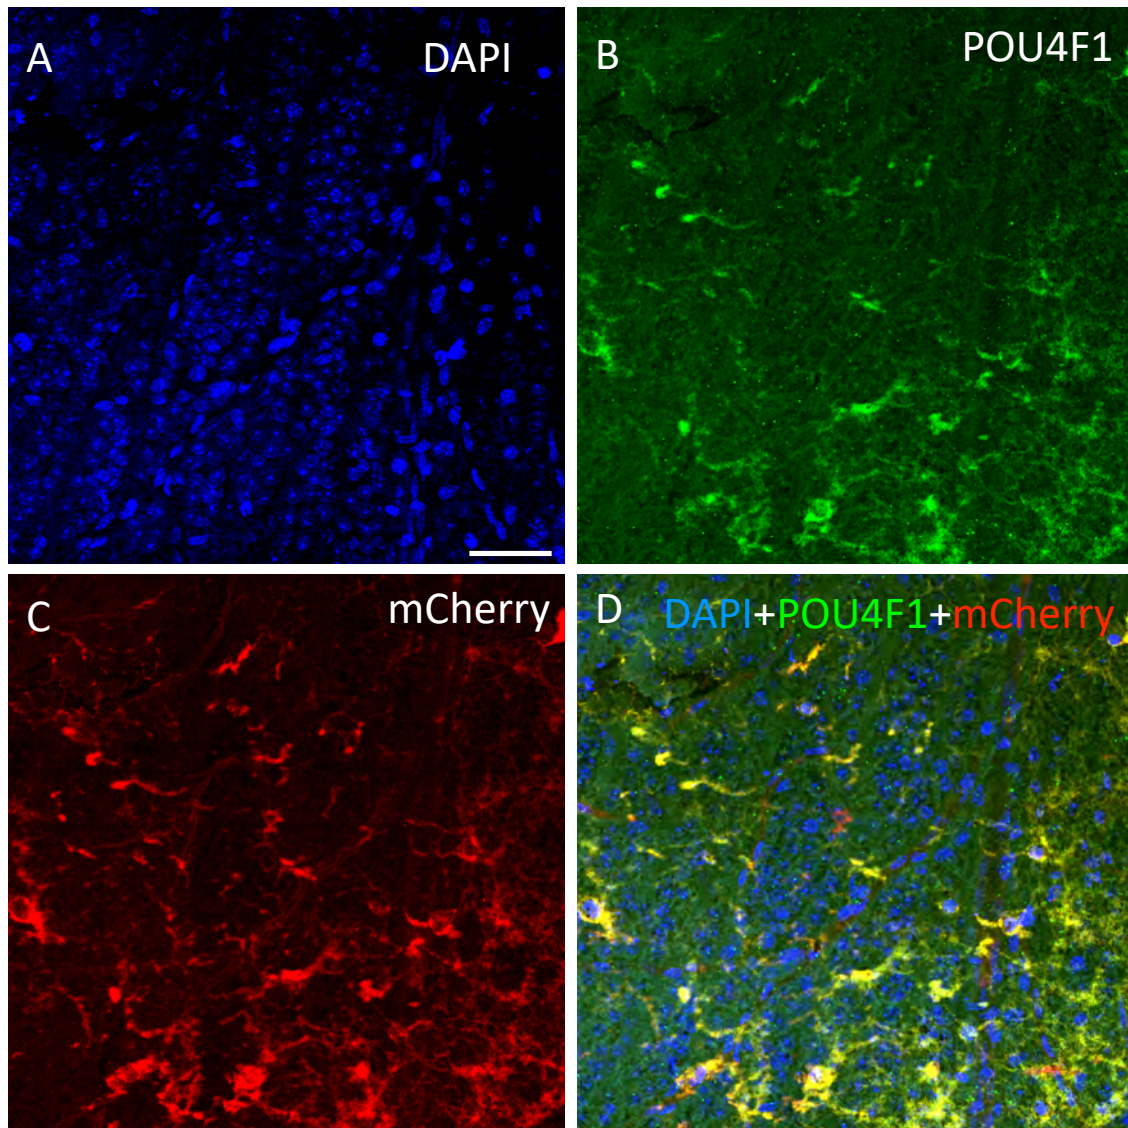

**Suppl. Fig. 6. *In-vivo* optical delivery of MCO-II to *rd10* mice retina is Retinal Ganglion Cell specific.** Fluorescence image of retina stained with: (A) nuclear stain DAPI. (B) RGC-specific staining using POU4F1. (C) Fluorescence image of reporter-mCherry expressed in retina after *in-vivo* optical delivery using CW 1064 nm laser beam. (D) Composite image of DAPI (blue), POU4F1 (green) and mCherry (red), showing co-localization of RGC with mCherry expression (yellow color). Scale bar = 50  $\mu$ m.

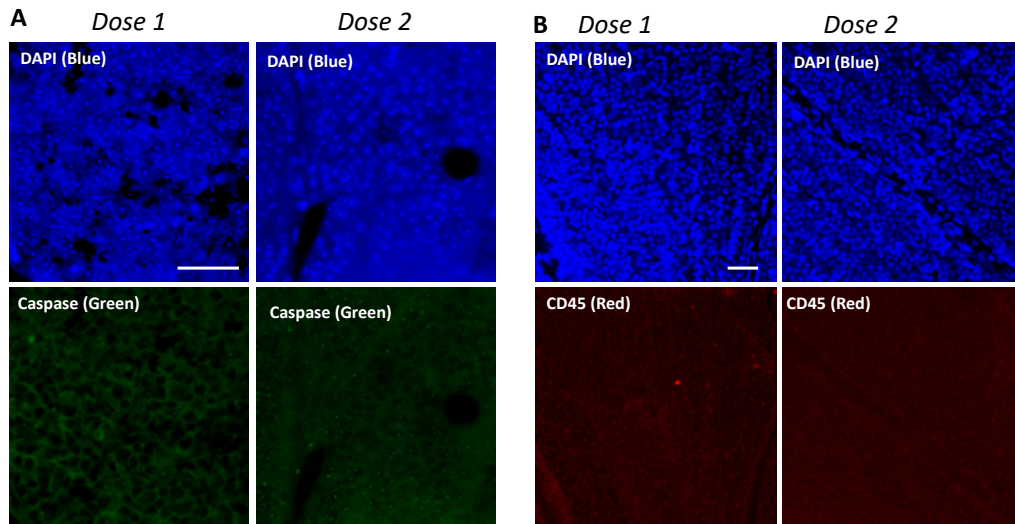

**Suppl. Fig. 7. *In-vivo* optical delivery of MCO-II to *rd10* mice retina does not compromise viability of retina or elicit immune response.** (A) Representative fluorescence images of retina stained with Caspase-3 (green) and DAPI (blue) for two different cw laser doses. Dose 1: 1.8 J/mm<sup>2</sup> (30 mW for 60 s); Dose 2: 3.6 J/mm<sup>2</sup> (60 mW for 60 s). Non-detectable apoptotic cells after optical delivery. (B) No detectable CD45 (red) signal, suggesting the absence of immune cells after MCO transfection. Dose 1: 0.9 J/mm<sup>2</sup> (30 mW for 30 s); Dose 2: 1.8 J/mm<sup>2</sup> (30 mW for 60 s). Laser irradiation area: 1 mm<sup>2</sup>. Scale bar = 50 μm.
